# Supplementary material
Source: PubMed Central journal article supplement (PMC3273319)
Supplement: NIHMS333987-supplement-01.pdf [file NIHMS333987-supplement-01.pdf]

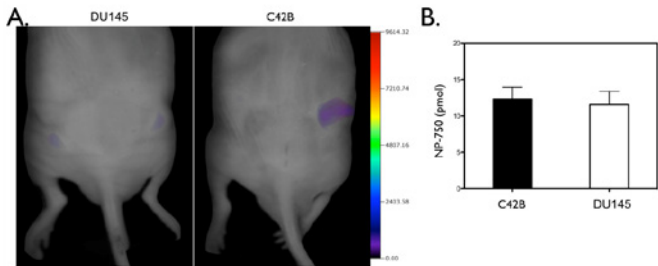

**Figure S1:** *In vivo* imaging using control NP. **A.** FMT image of non-conjugated AminoSpark750 (control NP) in DU145 or C42b subcutaneously injected mice. **B.** Quantitation of control NP uptake in tumored mice.

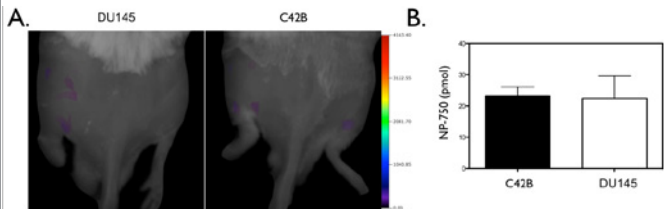

**Figure S2:** *In vivo* imaging of intratibially injected mice using control NP. **A.** FMT image of non-conjugated AminoSpark750 (control NP) in DU145 or C42b injected mice. **B.** Quantitation of control NP uptake in tumored mice.
